# Supplementary material for: Identification of Candidate Genes for Seed Glucosinolate Content Using Association Mapping in Brassica napus L
Source: PubMed Central journal article supplement (PMC4690036; doi:10.3390/genes6041215), 2015-11-18
Supplement: genes-06-01215-s001.pdf [file genes-06-01215-s001.pdf]

# Supplementary Materials

**Table S1.** List of rapeseed accessions used in the present study.

| Accession No. | Inbred Lines     | Country/Region           | Seed Glucosinolate Content ( $\mu\text{mol}\cdot\text{g}^{-1}$ ) |               |
|---------------|------------------|--------------------------|------------------------------------------------------------------|---------------|
|               |                  |                          | 2013                                                             | 2014          |
| B1            | Ganyou 5         | Chongqing (China)        | 102.88                                                           | 92.57         |
| B2            | Nonglin 42       | Chongqing (China)        | 104.38                                                           | 114.57        |
| B3            | Kelina           | Chongqing (China)        | 85.61                                                            | 77.36         |
| B4            | Huaiyou 6        | Chongqing (China)        | 34.02                                                            | 76.15         |
| B5            | Yan 81-2         | Chongqing (China)        | 76.64                                                            | 60.56         |
| B6            | 28887            | Chongqing (China)        | 90.83                                                            | 81.71         |
| <b>B7</b>     | <b>Qianyou 4</b> | <b>Chongqing (China)</b> | <b>108.40</b>                                                    | <b>110.33</b> |
| B8            | Qianyou 331      | Chongqing (China)        | 98.58                                                            | 95.48         |
| B9            | Enyou 73-1-2     | Chongqing (China)        | 133.35                                                           | 129.02        |
| B10           | Niuerduo         | Chongqing (China)        | 96.39                                                            | 110.05        |
| B11           | 880101           | Chongqing (China)        | 124.10                                                           | 122.29        |
| B12           | SWU40            | Chongqing (China)        | 38.67                                                            | 28.38         |
| B13           | SWU42            | Chongqing (China)        | 32.03                                                            | 31.88         |
| B14           | SWU43            | Chongqing (China)        | 32.53                                                            | 27.74         |
| B15           | SWU44            | Chongqing (China)        | 29.60                                                            | 25.81         |
| B16           | SWU45            | Chongqing (China)        | 29.39                                                            | 24.23         |
| B17           | SWU46            | Chongqing (China)        | 40.13                                                            | 31.42         |
| B18           | SWU47            | Chongqing (China)        | 46.55                                                            | 43.96         |
| B19           | SWU48            | Chongqing (China)        | 41.49                                                            | 40.97         |
| B20           | SWU52            | Chongqing (China)        | 32.79                                                            | 32.78         |
| B21           | SWU53            | Chongqing (China)        | 26.65                                                            | 25.55         |
| B22           | SWU56            | Chongqing (China)        | 40.05                                                            | 36.54         |
| B23           | SWU59            | Chongqing (China)        | 54.57                                                            | 54.28         |
| B24           | SWU65            | Chongqing (China)        | 29.62                                                            | 26.04         |
| B25           | SWU82            | Chongqing (China)        | 38.50                                                            | 33.61         |
| B26           | SWU83            | Chongqing (China)        | 34.84                                                            | 33.38         |
| B27           | SWU92            | Chongqing (China)        | 37.29                                                            | 31.35         |
| B28           | SWU101           | Chongqing (China)        | 38.04                                                            | 29.30         |
| B29           | SWU106           | Chongqing (China)        | 35.94                                                            | 27.86         |
| B30           | SWU108           | Chongqing (China)        | 33.10                                                            | 47.81         |
| B31           | Chuanyou 20      | Sichuan (China)          | 31.78                                                            | 26.80         |
| B32           | Chuanyou 18      | Sichuan (China)          | 29.20                                                            | 26.58         |
| B33           | CY12NY-7         | Sichuan (China)          | 116.12                                                           | 100.16        |
| B34           | CY12Q95406       | Sichuan (China)          | 30.39                                                            | 28.16         |
| B35           | CY12Q8-7         | Sichuan (China)          | 29.63                                                            | 24.19         |
| B36           | CY12QSZ06        | Sichuan (China)          | 27.01                                                            | 27.01         |
| B37           | CY12QCWH-1       | Sichuan (China)          | 40.43                                                            | 35.37         |
| B38           | CY12Q95108       | Sichuan (China)          | 31.80                                                            | 29.36         |
| B39           | CY12Q21535-N3    | Sichuan (China)          | 32.76                                                            | 41.05         |
| B40           | CY12PXW-4        | Sichuan (China)          | 40.61                                                            | 34.94         |
| B41           | CY12PXW-6        | Sichuan (China)          | 34.02                                                            | 32.50         |
| B42           | CY12PXW-9        | Sichuan (China)          | 37.53                                                            | 32.64         |
| B43           | CY13PXW-17       | Sichuan (China)          | 29.60                                                            | 26.49         |

Table S1. Cont.

| Accession No. | Inbred Lines    | Country/Region         | Seed Glucosinolate Content ( $\mu\text{mol}\cdot\text{g}^{-1}$ ) |               |
|---------------|-----------------|------------------------|------------------------------------------------------------------|---------------|
|               |                 |                        | 2013                                                             | 2014          |
| B44           | CY14PXW-18      | Sichuan (China)        | 42.37                                                            | 33.56         |
| B45           | CY15PXW-31      | Sichuan (China)        | 35.08                                                            | 31.60         |
| B46           | CY16PXW-35      | Sichuan (China)        | 42.51                                                            | 40.13         |
| B47           | CY17PXW-58      | Sichuan (China)        | 35.24                                                            | 30.85         |
| B48           | CY18PXW-62      | Sichuan (China)        | 34.69                                                            | 26.14         |
| B49           | CY19PXW-65      | Sichuan (China)        | 36.51                                                            | 39.17         |
| B50           | CY20PXW-66      | Sichuan (China)        | 27.34                                                            | 34.57         |
| B51           | CY21PXW-84      | Sichuan (China)        | 35.01                                                            | 28.15         |
| <b>B52</b>    | <b>CY12GJ-1</b> | <b>Sichuan (China)</b> | <b>102.41</b>                                                    | <b>105.60</b> |
| B53           | wx1025          | Hunan (China)          | 39.21                                                            | 35.22         |
| B54           | wx10213         | Hunan (China)          | 39.89                                                            | 29.97         |
| B55           | wx10296         | Hunan (China)          | 39.49                                                            | 30.91         |
| B56           | wx10315         | Hunan (China)          | 28.00                                                            | 27.09         |
| B57           | 10-1043         | Hunan (China)          | 34.84                                                            | 42.39         |
| B58           | 10-1047         | Hunan (China)          | 33.10                                                            | 29.75         |
| B59           | 10-1061         | Hunan (China)          | 40.74                                                            | 34.81         |
| B60           | 10-1070         | Hunan (China)          | 42.18                                                            | 32.53         |
| B61           | 10-804          | Hunan (China)          | 37.70                                                            | 43.57         |
| B62           | 10-1358         | Hunan (China)          | 40.37                                                            | 32.34         |
| <b>B63</b>    | <b>1472</b>     | <b>Hunan (China)</b>   | <b>34.74</b>                                                     | <b>31.58</b>  |
| B64           | Xiangyou 13     | Hunan (China)          | 36.55                                                            | 32.64         |
| B65           | Xiangyou 15     | Hunan (China)          | 31.68                                                            | 26.62         |
| B66           | Xiangyou 11     | Hunan (China)          | 38.07                                                            | 33.42         |
| B67           | 740             | Hunan (China)          | 36.22                                                            | 29.76         |
| B68           | 631             | Hunan (China)          | 37.86                                                            | 35.60         |
| B69           | 613             | Hunan (China)          | 40.88                                                            | 44.73         |
| B70           | 783             | Hunan (China)          | 35.81                                                            | 35.77         |
| B71           | 782             | Hunan (China)          | 37.67                                                            | 36.84         |
| B72           | YB3             | Hunan (China)          | 36.19                                                            | 31.24         |
| B73           | 1360            | Hunan (China)          | 35.35                                                            | 29.24         |
| B74           | 563             | Hunan (China)          | 42.55                                                            | 36.10         |
| B75           | WX10329         | Hunan (China)          | 39.24                                                            | 30.60         |
| B76           | santana         | Hunan (China)          | 36.84                                                            | 34.75         |
| B77           | 1281            | Hunan (China)          | 43.90                                                            | 31.24         |
| B78           | 509             | Hunan (China)          | 34.79                                                            | 29.98         |
| B79           | 1368            | Hunan (China)          | 38.59                                                            | 35.47         |
| B80           | 1322            | Hunan (China)          | 44.02                                                            | 28.98         |
| B81           | 1252            | Hunan (China)          | 35.12                                                            | 30.90         |
| B82           | 1321            | Hunan (China)          | 39.52                                                            | 28.14         |
| B83           | 07022           | Hubei (China)          | 36.50                                                            | 30.24         |
| B84           | 07094           | Hubei (China)          | 33.46                                                            | 24.89         |
| B85           | 07016           | Hubei (China)          | 32.60                                                            | 25.98         |
| B86           | 9F087           | Hubei (China)          | 36.26                                                            | 34.81         |

Table S1. Cont.

| Accession No. | Inbred Lines   | Country/Region       | Seed Glucosinolate Content ( $\mu\text{mol}\cdot\text{g}^{-1}$ ) |               |
|---------------|----------------|----------------------|------------------------------------------------------------------|---------------|
|               |                |                      | 2013                                                             | 2014          |
| B87           | 97096          | Hubei (China)        | 36.10                                                            | 37.07         |
| B88           | 97097          | Hubei (China)        | 33.63                                                            | 33.39         |
| B89           | 07189          | Hubei (China)        | 72.04                                                            | 116.72        |
| B90           | 07191          | Hubei (China)        | 85.24                                                            | 102.91        |
| <b>B91</b>    | <b>07037</b>   | <b>Hubei (China)</b> | <b>31.30</b>                                                     | <b>33.99</b>  |
| B92           | RQ011          | Hubei (China)        | 39.60                                                            | 27.20         |
| B93           | RR009          | Hubei (China)        | 32.66                                                            | 41.98         |
| B94           | RR002          | Hubei (China)        | 35.15                                                            | 26.40         |
| <b>B95</b>    | <b>97177</b>   | <b>Hubei (China)</b> | <b>109.00</b>                                                    | <b>118.18</b> |
| B96           | 96021          | Hubei (China)        | 47.67                                                            | 54.46         |
| B97           | 96063          | Hubei (China)        | 44.99                                                            | 40.03         |
| B98           | 01111          | Hubei (China)        | 32.84                                                            | 22.35         |
| B99           | 01570          | Hubei (China)        | 35.99                                                            | 29.63         |
| B100          | 9Bao22         | Hubei (China)        | 47.78                                                            | 43.61         |
| B101          | 01188          | Hubei (China)        | 32.91                                                            | 24.24         |
| B102          | 02354          | Hubei (China)        | 41.62                                                            | 39.01         |
| B103          | 02359          | Hubei (China)        | 33.28                                                            | 26.68         |
| B104          | 02365          | Hubei (China)        | 32.58                                                            | 29.61         |
| B105          | 93205          | Hubei (China)        | 36.70                                                            | 32.57         |
| B106          | 93210          | Hubei (China)        | 36.13                                                            | 50.84         |
| B107          | Nca            | Hubei (China)        | 33.85                                                            | 33.29         |
| B108          | Zhongshuang 4  | Hubei (China)        | 35.46                                                            | 24.97         |
| B109          | Zhongshuang 9  | Hubei (China)        | 32.63                                                            | 34.64         |
| B110          | Zhongshuang 11 | Hubei (China)        | 35.03                                                            | 23.37         |
| B111          | 2011-6200      | Hubei (China)        | 24.22                                                            | 20.53         |
| B112          | 2011-6308      | Hubei (China)        | 34.23                                                            | 38.55         |
| B113          | 2011-7103      | Hubei (China)        | 43.84                                                            | 38.48         |
| B114          | 2012-11526     | Hubei (China)        | 34.59                                                            | 32.04         |
| B115          | 2012-3448      | Hubei (China)        | 31.62                                                            | 30.59         |
| B116          | 2012-3546      | Hubei (China)        | 32.44                                                            | 26.75         |
| B117          | 2012-4531      | Hubei (China)        | 33.08                                                            | 26.87         |
| B118          | 2012-5086      | Hubei (China)        | 29.48                                                            | 31.92         |
| B119          | 2012-5113      | Hubei (China)        | 30.55                                                            | 30.95         |
| B120          | 2012-8327      | Hubei (China)        | 32.06                                                            | 28.03         |
| B121          | 2012-8355      | Hubei (China)        | 36.12                                                            | 38.75         |
| B122          | 2012-8380      | Hubei (China)        | 36.60                                                            | 30.55         |
| B123          | 2012-8998      | Hubei (China)        | 34.73                                                            | 27.79         |
| B124          | 2012-9323      | Hubei (China)        | 37.66                                                            | 30.30         |
| B125          | 2012-9354      | Hubei (China)        | 32.01                                                            | 31.55         |
| B126          | 2012-9380      | Hubei (China)        | 27.11                                                            | 24.92         |
| B127          | 2012-9478      | Hubei (China)        | 42.53                                                            | 40.59         |
| B128          | 2012-9542      | Hubei (China)        | 31.72                                                            | 30.89         |
| B129          | 2012-K8053     | Hubei (China)        | 36.66                                                            | 28.43         |

Table S1. Cont.

| Accession No. | Inbred Lines   | Country/Region | Seed Glucosinolate Content ( $\mu\text{mol}\cdot\text{g}^{-1}$ ) |        |
|---------------|----------------|----------------|------------------------------------------------------------------|--------|
|               |                |                | 2013                                                             | 2014   |
| B130          | R2             | Hubei (China)  | 35.20                                                            | 32.99  |
| B131          | Xiwang 106     | Hubei (China)  | 44.05                                                            | 38.36  |
| B132          | Yangguang 198  | Hubei (China)  | 43.12                                                            | 35.25  |
| B133          | Yangguang 2009 | Hubei (China)  | 39.77                                                            | 32.49  |
| B134          | Zhongshuang 10 | Hubei (China)  | 40.76                                                            | 38.59  |
| B135          | Zhongshuang 12 | Hubei (China)  | 33.47                                                            | 29.32  |
| B136          | Zhongshuang 4  | Hubei (China)  | 35.46                                                            | 23.89  |
| B137          | Zhongshuang 6  | Hubei (China)  | 28.99                                                            | 27.94  |
| B138          | Zhongshuang 7  | Hubei (China)  | 34.29                                                            | 31.04  |
| B139          | Zhongyou 589   | Hubei (China)  | 29.23                                                            | 28.81  |
| B140          | Zhongyou 821Q  | Hubei (China)  | 70.59                                                            | 73.51  |
| B141          | Huayou 2       | Hubei (China)  | 78.87                                                            | 82.71  |
| B142          | Major          | Hubei (China)  | 121.82                                                           | 125.29 |
| B143          | Huashuang 2    | Hubei (China)  | 43.53                                                            | 46.31  |
| B144          | Aurora         | Hubei (China)  | 98.65                                                            | 79.93  |
| B145          | Huayou 13      | Hubei (China)  | 120.38                                                           | 125.58 |
| B146          | Rucabo         | Hubei (China)  | 83.79                                                            | 76.52  |
| B147          | Huayou 3       | Hubei (China)  | 86.62                                                            | 96.06  |
| B148          | Huayou 14      | Hubei (China)  | 125.46                                                           | 128.35 |
| B149          | Ningyou 1      | Hubei (China)  | 100.80                                                           | 112.24 |
| B150          | Ceres          | Hubei (China)  | 80.77                                                            | 70.81  |
| B151          | 11-9-700       | Hubei (China)  | 88.14                                                            | 31.06  |
| B152          | 11-9-701       | Hubei (China)  | 47.11                                                            | 46.75  |
| B153          | 11-9-702       | Hubei (China)  | 36.03                                                            | 28.45  |
| B154          | 11-9-703       | Hubei (China)  | 41.06                                                            | 37.31  |
| B155          | 11-9-704       | Hubei (China)  | 37.95                                                            | 28.97  |
| B156          | 11-9-705       | Hubei (China)  | 35.21                                                            | 30.36  |
| B157          | 11-9-706       | Hubei (China)  | 42.69                                                            | 33.49  |
| B158          | 11-9-707       | Hubei (China)  | 31.37                                                            | 35.37  |
| B159          | 11-P63-5Yu7    | Hubei (China)  | 34.88                                                            | 28.31  |
| B160          | 11-P63-8Yu32   | Hubei (China)  | 31.72                                                            | 23.54  |
| B161          | 11-P63-3Yu3    | Hubei (China)  | 28.94                                                            | 29.13  |
| B162          | 11-P67Dong     | Hubei (China)  | 35.34                                                            | 41.88  |
| B163          | 09-P64-1       | Hubei (China)  | 36.52                                                            | 36.02  |
| B164          | 10-Cong 23     | Hubei (China)  | 33.06                                                            | 31.03  |
| B165          | 10-Cong 24     | Hubei (China)  | 39.24                                                            | 34.72  |
| B166          | 10-Cong 25     | Hubei (China)  | 31.51                                                            | 34.99  |
| B167          | 10-Cong 29     | Hubei (China)  | 38.36                                                            | 33.29  |
| B168          | 10-Cong 32     | Hubei (China)  | 39.32                                                            | 29.80  |
| B169          | 10-Cong 33     | Hubei (China)  | 40.81                                                            | 36.32  |
| B170          | 10-Cong 34     | Hubei (China)  | 32.57                                                            | 25.63  |
| B171          | 10-Jiangpeng 2 | Hubei (China)  | 45.40                                                            | 59.01  |
| B172          | 10-Jiangpeng 3 | Hubei (China)  | 34.52                                                            | 29.23  |

Table S1. Cont.

| Accession No. | Inbred Lines  | Country/Region         | Seed Glucosinolate Content ( $\mu\text{mol}\cdot\text{g}^{-1}$ ) |       |
|---------------|---------------|------------------------|------------------------------------------------------------------|-------|
|               |               |                        | 2013                                                             | 2014  |
| B173          | 11-Yu7-103    | Hubei (China)          | 32.72                                                            | 30.37 |
| B174          | 11-Yu7-117    | Hubei (China)          | 38.11                                                            | 36.44 |
| B175          | 11-Yu7-125    | Hubei (China)          | 39.27                                                            | 36.00 |
| B176          | 11-P74-8      | Hubei (China)          | 36.60                                                            | 29.71 |
| B177          | 11-P74-13     | Hubei (China)          | 27.63                                                            | 23.61 |
| B178          | 7-7766-74     | Hubei (China)          | 34.31                                                            | 27.78 |
| B179          | P18           | Hubei (China)          | 37.59                                                            | 31.06 |
| B180          | 64Peng-10     | Hubei (China)          | 63.27                                                            | 30.78 |
| B181          | Shengguang 77 | Hubei (China)          | 45.89                                                            | 47.51 |
| B182          | Jiayu17peng   | Hubei (China)          | 33.02                                                            | 33.38 |
| B183          | Jiayu25peng   | Hubei (China)          | 41.23                                                            | 33.63 |
| B184          | Jiayu16peng   | Hubei (China)          | 38.49                                                            | 29.06 |
| B185          | Jiayu31peng   | Hubei (China)          | 39.26                                                            | 28.61 |
| B186          | Huashuang5    | Hubei (China)          | 37.71                                                            | 33.66 |
| B187          | Huashuang4    | Hubei (China)          | 34.96                                                            | 35.10 |
| B188          | Jia972        | Hubei (China)          | 39.32                                                            | 44.23 |
| B189          | Huashuang128  | Hubei (China)          | 33.75                                                            | 29.87 |
| B190          | Jia904        | Hubei (China)          | 37.19                                                            | 30.97 |
| B191          | Jia908        | Hubei (China)          | 37.38                                                            | 38.40 |
| B192          | JiaPF190peng  | Hubei (China)          | 38.63                                                            | 32.43 |
| B193          | Jia915        | Hubei (China)          | 33.42                                                            | 32.10 |
| B194          | Jia922        | Hubei (China)          | 31.58                                                            | 29.05 |
| B195          | Jia951peng    | Hubei (China)          | 34.75                                                            | 30.89 |
| B196          | Jia917        | Hubei (China)          | 33.54                                                            | 29.54 |
| B197          | Jia923        | Hubei (China)          | 36.72                                                            | 28.54 |
| B198          | Jia931        | Hubei (China)          | 36.19                                                            | 53.53 |
| B199          | Jiayu05peng   | Hubei (China)          | 29.97                                                            | 42.52 |
| B200          | Jia963peng    | Hubei (China)          | 38.54                                                            | 27.61 |
| B201          | Huyou 17      | Shanghai (China)       | 35.56                                                            | 27.51 |
| B202          | Huyou 15      | Shanghai (China)       | 32.15                                                            | 26.10 |
| B203          | Huyou 12      | Shanghai (China)       | 41.03                                                            | 27.12 |
| B204          | Ningyou 18    | Jiangsu (China)        | 31.42                                                            | 27.50 |
| B205          | Ningyou 16    | Jiangsu (China)        | 37.63                                                            | 40.52 |
| B206          | Ningyou 14    | Jiangsu (China)        | 37.07                                                            | 33.04 |
| B207          | Ningyou 12    | Jiangsu (China)        | 40.05                                                            | 32.43 |
| B208          | Shilijia      | Nanjing (China)        | 66.07                                                            | 35.98 |
| B209          | Shilifeng     | Nanjing (China)        | 55.94                                                            | 60.19 |
| B210          | Yangyou 6     | Lixia (Jiangsu, China) | 36.81                                                            | 30.58 |
| B211          | Yangyou 5     | Lixia (Jiangsu, China) | 40.25                                                            | 35.27 |
| B212          | Zhenyou 3     | Zhenjiang (China)      | 44.55                                                            | 39.66 |
| B213          | Hongyou 3     | Nanjiang (China)       | 37.37                                                            | 30.01 |
| B214          | Suyou 1       | Jiangsu (China)        | 34.60                                                            | 34.82 |
| B215          | Zheyong 18    | Zhenjiang (China)      | 33.14                                                            | 29.74 |

Table S1. Cont.

| Accession No. | Inbred Lines | Country/Region    | Seed Glucosinolate Content ( $\mu\text{mol}\cdot\text{g}^{-1}$ ) |        |
|---------------|--------------|-------------------|------------------------------------------------------------------|--------|
|               |              |                   | 2013                                                             | 2014   |
| B216          | Zheshuang 72 | Zhenjiang (China) | 44.13                                                            | 45.57  |
| B217          | Zheshuang 8  | Zhenjiang (China) | 36.99                                                            | 29.73  |
| B218          | Zheyong 758  | Zhenjiang (China) | 79.90                                                            | 75.34  |
| B219          | Huyou 14     | Shanghai (China)  | 37.33                                                            | 34.09  |
| B220          | Huyou 18     | Shanghai (China)  | 43.67                                                            | 39.24  |
| B221          | Huyou 19     | Shanghai (China)  | 42.67                                                            | 25.83  |
| B222          | Zheyong 19   | Zhenjiang (China) | 56.73                                                            | 35.12  |
| B223          | Zheyong 21   | Zhenjiang (China) | 36.59                                                            | 27.61  |
| B224          | Zheshuang 6  | Zhenjiang (China) | 54.44                                                            | 47.04  |
| B225          | Wanyou 15    | Anhui (China)     | 91.24                                                            | 96.65  |
| B226          | Wanyou 16    | Anhui (China)     | 40.12                                                            | 42.02  |
| B227          | Wanyou 20    | Anhui (China)     | 34.15                                                            | 33.50  |
| B228          | Wanyou 29    | Anhui (China)     | 34.14                                                            | 27.40  |
| B236          | AGREV012     | German            | 30.72                                                            | 28.36  |
| B237          | AGREV019     | German            | 28.97                                                            | 30.08  |
| B238          | AGREV021     | German            | 37.06                                                            | 37.80  |
| B239          | Topas        | Sweden            | 51.28                                                            | 77.30  |
| B240          | cyclon       | Denmark           | 28.08                                                            | 26.87  |
| B241          | Weijie       | Canada            | 34.57                                                            | 30.45  |
| B242          | Sida         | Canada            | 47.49                                                            | 45.74  |
| B243          | Zhizun       | Canada            | 115.22                                                           | 98.37  |
| B244          | Haisheng     | Canada            | 42.14                                                            | 35.16  |
| B245          | D2           | Denmark           | 102.97                                                           | 85.86  |
| B246          | D3           | Denmark           | 51.42                                                            | 27.70  |
| B247          | Qu           | United States     | 36.13                                                            | 23.57  |
| B248          | 11-985       | Qinghai (China)   | 49.82                                                            | 43.65  |
| B249          | 11-504       | Qinghai (China)   | 34.58                                                            | 29.81  |
| B250          | 11-997       | Qinghai (China)   | 43.75                                                            | 37.55  |
| B251          | 11-540       | Qinghai (China)   | 32.64                                                            | 33.51  |
| B252          | 11-1184      | Qinghai (China)   | 41.11                                                            | 35.75  |
| B253          | 10-758       | Qinghai (China)   | 30.40                                                            | 23.70  |
| B254          | 10-1230      | Qinghai (China)   | 34.28                                                            | 34.77  |
| B255          | 10-847       | Qinghai (China)   | 39.77                                                            | 31.98  |
| B256          | 11-1124      | Qinghai (China)   | 42.54                                                            | 40.91  |
| B257          | Shan2A       | Shanxi (China)    | 108.48                                                           | 113.52 |
| B258          | Shan2B       | Shanxi (China)    | 109.70                                                           | 121.02 |
| B259          | KenC1        | Shanxi (China)    | 122.07                                                           | 109.90 |
| B260          | P113         | Shanxi (China)    | 35.06                                                            | 28.11  |
| B261          | P158         | Shanxi (China)    | 29.57                                                            | 29.21  |
| B262          | P310         | Shanxi (China)    | 48.88                                                            | 39.51  |
| B263          | P312         | Shanxi (China)    | 37.66                                                            | 52.37  |
| B264          | P668         | Shanxi (China)    | 36.68                                                            | 32.97  |
| B265          | P685         | Shanxi (China)    | 41.28                                                            | 36.17  |

Table S1. Cont.

| Accession No. | Inbred Lines | Country/Region   | Seed Glucosinolate Content ( $\mu\text{mol}\cdot\text{g}^{-1}$ ) |        |
|---------------|--------------|------------------|------------------------------------------------------------------|--------|
|               |              |                  | 2013                                                             | 2014   |
| B266          | A117         | Shanxi (China)   | 45.08                                                            | 40.66  |
| B268          | B250         | Shanxi (China)   | 39.62                                                            | 37.98  |
| B269          | B265         | Shanxi (China)   | 40.68                                                            | 30.08  |
| B270          | A109         | Shanxi (China)   | 131.19                                                           | 149.83 |
| B271          | B285         | Shanxi (China)   | 43.23                                                            | 40.73  |
| B272          | C052         | Shanxi (China)   | 49.07                                                            | 54.71  |
| B273          | GY270        | Shanxi (China)   | 45.66                                                            | 35.82  |
| B274          | GY282        | Shanxi (China)   | 39.05                                                            | 37.53  |
| B275          | GY284        | Shanxi (China)   | 39.53                                                            | 35.24  |
| B276          | B262         | Henan (China)    | 36.61                                                            | 37.65  |
| B277          | A82          | Jiangxi (China)  | 68.34                                                            | 57.89  |
| B278          | A98          | Shanxi (China)   | 85.40                                                            | 86.82  |
| B279          | B414         | Xinjiang (China) | 111.01                                                           | 82.02  |
| B280          | B308         | Sweden           | 108.65                                                           | 70.01  |
| B281          | A97          | Sichuan (China)  | 95.62                                                            | 86.35  |
| B282          | A148         | Sweden           | 104.58                                                           | 107.25 |
| B283          | B431         | Denmark          | 35.32                                                            | 37.34  |
| B284          | 08-P35       | Hubei (China)    | 58.22                                                            | 41.48  |
| B285          | 08-P36       | Hubei (China)    | 33.26                                                            | 29.52  |
| B286          | 09-P32       | Hubei (China)    | 47.97                                                            | 51.98  |
| B287          | 09-P36       | Hubei (China)    | 37.11                                                            | 28.12  |
| B288          | 09-P37       | Hubei (China)    | 30.62                                                            | 28.22  |
| B289          | 10-P10       | Hubei (China)    | 37.46                                                            | 39.11  |
| B290          | 10-P29       | Hubei (China)    | 45.69                                                            | 46.29  |
| B291          | 11-P30       | Hubei (China)    | 34.63                                                            | 29.59  |
| B292          | 12-P24       | Hubei (China)    | 29.64                                                            | 37.05  |
| B293          | 12-P25       | Hubei (China)    | 31.24                                                            | 29.54  |
| B294          | 03 II B      | Gansu (China)    | 64.96                                                            | 120.37 |
| B296          | 03 I 32B     | Gansu (China)    | 48.23                                                            | 60.13  |
| B297          | 964          | Gansu (China)    | 78.96                                                            | 49.54  |
| B298          | DDI          | Gansu (China)    | 96.72                                                            | 68.97  |
| B299          | gl302-1      | Gansu (China)    | 117.49                                                           | 112.42 |
| B300          | 0679F        | Gansu (China)    | 80.90                                                            | 62.97  |
| B301          | Longyou 2    | Gansu (China)    | 53.47                                                            | 57.02  |
| B302          | 03 II 4B     | Gansu (China)    | 108.97                                                           | 116.96 |
| B303          | 03LF1        | Gansu (China)    | 50.41                                                            | 123.86 |
| B304          | 9852         | Gansu (China)    | 61.76                                                            | 70.46  |
| B305          | 9801C        | Gansu (China)    | 67.80                                                            | 50.64  |
| B306          | 986          | Gansu (China)    | 64.46                                                            | 66.84  |
| B307          | 876          | Gansu (China)    | 76.14                                                            | 88.26  |
| B308          | Wu164        | Gansu (China)    | 59.82                                                            | 64.28  |
| B309          | Longyou 4    | Gansu (China)    | 60.64                                                            | 82.91  |
| B310          | 9889         | Gansu (China)    | 57.41                                                            | 59.34  |

Table S1. Cont.

| Accession No. | Inbred Lines         | Country/Region            | Seed Glucosinolate Content ( $\mu\text{mol}\cdot\text{g}^{-1}$ ) |              |
|---------------|----------------------|---------------------------|------------------------------------------------------------------|--------------|
|               |                      |                           | 2013                                                             | 2014         |
| B311          | 06H7                 | Gansu (China)             | 97.69                                                            | 94.22        |
| B312          | Tianyou 4            | Gansu (China)             | 54.53                                                            | 68.51        |
| B313          | Hubeibaihua rapeseed | Hubei (China)             | 96.81                                                            | 85.57        |
| B314          | Nanchuanchangjiao    | Chongqing (China)         | 51.66                                                            | 52.50        |
| B315          | IMC103               | Chongqing (China)         | 91.18                                                            | 110.52       |
| B316          | Oscar                | Chongqing (China)         | 32.29                                                            | 29.40        |
| B317          | Sophia               | German                    | 36.39                                                            | 27.04        |
| B318          | campina              | German                    | 31.85                                                            | 35.49        |
| B319          | Conny                | German                    | 36.60                                                            | 35.87        |
| B320          | Wesreo               | German                    | 109.91                                                           | 111.99       |
| B321          | Wase Chousen         | German                    | 132.80                                                           | 141.35       |
| B322          | Gogatsuna            | German                    | 134.29                                                           | 110.86       |
| B323          | Nakaee Chousen       | German                    | 114.35                                                           | 108.80       |
| B324          | Cat.No.117           | German                    | 100.02                                                           | 115.25       |
| B325          | 90750                | Chongqing (China)         | 109.42                                                           | 104.27       |
| B326          | Nonglin43            | Chongqing (China)         | 111.59                                                           | 115.22       |
| B327          | Tibet rapeseed       | Tibet (China)             | 99.34                                                            | 101.67       |
| B328          | Youyan2              | Chongqing (China)         | 71.40                                                            | 87.62        |
| B329          | Aijiazao             | Wenjiang (Sichuan, China) | 111.29                                                           | 127.74       |
| B330          | SWU41                | Chongqing (China)         | 48.21                                                            | 32.74        |
| B331          | SWU49                | Chongqing (China)         | 42.88                                                            | 40.87        |
| B332          | SWU54                | Chongqing (China)         | 111.77                                                           | 143.58       |
| B333          | SWU57                | Chongqing (China)         | 34.25                                                            | 33.38        |
| B334          | SWU60                | Chongqing (China)         | 38.68                                                            | 40.35        |
| B335          | SWU61                | Chongqing (China)         | 31.91                                                            | 37.59        |
| B336          | SWU62                | Chongqing (China)         | 37.51                                                            | 32.23        |
| B337          | SWU63                | Chongqing (China)         | 46.16                                                            | 33.02        |
| B338          | SWU64                | Chongqing (China)         | 40.69                                                            | 35.33        |
| B339          | SWU66                | Chongqing (China)         | 60.20                                                            | 44.24        |
| B340          | SWU67                | Chongqing (China)         | 43.22                                                            | 39.06        |
| B341          | SWU68                | Chongqing (China)         | 32.50                                                            | 30.09        |
| <b>B342</b>   | <b>SWU69</b>         | <b>Chongqing (China)</b>  | <b>25.76</b>                                                     | <b>21.90</b> |
| B343          | SWU70                | Chongqing (China)         | 36.09                                                            | 32.89        |
| B344          | SWU71                | Chongqing (China)         | 30.85                                                            | 30.93        |
| B345          | SWU74                | Chongqing (China)         | 50.89                                                            | 38.11        |
| B346          | SWU75                | Chongqing (China)         | 37.81                                                            | 28.97        |
| B347          | SWU76                | Chongqing (China)         | 42.55                                                            | 28.11        |
| B348          | SWU77                | Chongqing (China)         | 34.30                                                            | 36.51        |
| B349          | SWU80                | Chongqing (China)         | 39.17                                                            | 28.27        |
| B350          | SWU81                | Chongqing (China)         | 57.19                                                            | 29.48        |
| B351          | SWU84                | Chongqing (China)         | 37.52                                                            | 28.13        |
| B352          | SWU85                | Chongqing (China)         | 41.75                                                            | 33.89        |
| B353          | SWU87                | Chongqing (China)         | 33.72                                                            | 32.85        |



Table S1. Cont.

| Accession No. | Inbred Lines   | Country/Region    | Seed Glucosinolate Content ( $\mu\text{mol}\cdot\text{g}^{-1}$ ) |        |
|---------------|----------------|-------------------|------------------------------------------------------------------|--------|
|               |                |                   | 2013                                                             | 2014   |
| B354          | SWU88          | Chongqing (China) | 36.98                                                            | 33.84  |
| B355          | SWU89          | Chongqing (China) | 35.62                                                            | 25.91  |
| B356          | SWU90          | Chongqing (China) | 36.21                                                            | 26.99  |
| B357          | SWU93          | Chongqing (China) | 44.57                                                            | 32.48  |
| B358          | SWU94          | Chongqing (China) | 41.38                                                            | 38.92  |
| B359          | SWU95          | Chongqing (China) | 109.16                                                           | 107.01 |
| B360          | SWU96          | Chongqing (China) | 34.11                                                            | 31.31  |
| B361          | SWU99          | Chongqing (China) | 33.58                                                            | 31.74  |
| B362          | SWU100         | Chongqing (China) | 44.93                                                            | 33.87  |
| B363          | SWU102         | Chongqing (China) | 35.70                                                            | 34.98  |
| B364          | SWU103         | Chongqing (China) | 37.18                                                            | 35.84  |
| B365          | SWU104         | Chongqing (China) | 41.43                                                            | 37.96  |
| B366          | SWU105         | Chongqing (China) | 34.09                                                            | 29.32  |
| B367          | SWU107         | Chongqing (China) | 92.26                                                            | 58.67  |
| B368          | SWU110         | Chongqing (China) | 38.89                                                            | 35.65  |
| B369          | SWU111         | Chongqing (China) | 120.87                                                           | 138.54 |
| B370          | SWU112         | Chongqing (China) | 36.07                                                            | 30.45  |
| B371          | SWU113         | Chongqing (China) | 45.39                                                            | 40.41  |
| B372          | SWU114         | Chongqing (China) | 49.01                                                            | 46.31  |
| B373          | Zhongshuang 10 | Hubei (China)     | 80.74                                                            | 36.21  |
| B374          | Zhongshuang 6  | Hubei (China)     | 45.68                                                            | 34.11  |
| B375          | Zhongshuang 7  | Hubei (China)     | 54.91                                                            | 44.25  |
| B376          | Zhongshuang 12 | Hubei (China)     | 50.28                                                            | 41.38  |
| B377          | Zhongyou 589   | Hubei (China)     | 36.96                                                            | 30.59  |
| B378          | Fuyou 4        | Hubei (China)     | 91.35                                                            | 77.90  |
| B379          | Zhen 3736      | Hubei (China)     | 72.00                                                            | 61.35  |
| B380          | Zhen 2609      | Jiangsu (China)   | 70.85                                                            | 84.30  |
| B381          | HX0352         | Jiangsu (China)   | 84.27                                                            | 92.08  |
| B383          | Huyou 21       | Shanghai (China)  | 85.37                                                            | 98.55  |
| B384          | Zheshuang 3    | Zhejiang (China)  | 81.25                                                            | 100.65 |
| B385          | Zheyu 21       | Zhejiang (China)  | 66.11                                                            | 63.51  |
| B386          | Wanyou 20      | Anhui (China)     | 73.66                                                            | 90.61  |
| B387          | Wanyou 12      | Anhui (China)     | 68.63                                                            | 89.10  |
| B388          | Wanyou 7       | Anhui (China)     | 87.21                                                            | 91.48  |
| B389          | Hongyou 3      | Nanjing (China)   | 79.48                                                            | 55.06  |
| B390          | Zhenyou 5      | Hubei (China)     | 91.83                                                            | 92.70  |
| B391          | Yangyou 4      | Hubei (China)     | 87.57                                                            | 88.32  |
| B392          | Huyou 15       | Shanghai (China)  | 76.21                                                            | 84.72  |
| B393          | Huyou 16       | Shanghai (China)  | 96.94                                                            | 83.19  |
| B394          | Huyou 17       | Shanghai (China)  | 64.17                                                            | 43.54  |
| B395          | Huyou 18       | Zhejiang (China)  | 88.03                                                            | 65.15  |
| B396          | Zheshuang 72   | Zhejiang (China)  | 79.15                                                            | 50.05  |
| B397          | Zheshuang 8    | Zhejiang (China)  | 74.94                                                            | 64.19  |

Table S1. Cont.

| Accession No. | Inbred Lines     | Country/Region   | Seed Glucosinolate Content ( $\mu\text{mol}\cdot\text{g}^{-1}$ ) |        |
|---------------|------------------|------------------|------------------------------------------------------------------|--------|
|               |                  |                  | 2013                                                             | 2014   |
| B398          | Zheyong 50       | Zhejiang (China) | 81.00                                                            | 64.99  |
| B399          | Suyong 1         | Jiangsu (China)  | 37.73                                                            | 29.43  |
| B400          | Zhongshuang 4    | Hubei (China)    | 35.08                                                            | 28.17  |
| B401          | Zhongshuang 11   | Hubei (China)    | 35.05                                                            | 30.05  |
| B402          | Yangguang 198    | Hubei (China)    | 31.17                                                            | 26.55  |
| B403          | Huayang 901      | Hubei (China)    | 44.24                                                            | 38.00  |
| B404          | Yang J6711       | Jiangsu (China)  | 42.57                                                            | 33.19  |
| B405          | Yan 6055         | Jiangsu (China)  | 43.73                                                            | 32.03  |
| B406          | Yangjian 8       | Jiangsu (China)  | 37.65                                                            | 35.58  |
| B407          | Xiwang 106       | Hubei (China)    | 41.08                                                            | 34.04  |
| B408          | Zheyong 17       | Zhejiang (China) | 45.19                                                            | 32.31  |
| B409          | Zhongshuang 5    | Hubei (China)    | 45.40                                                            | 80.78  |
| B410          | Zhongyou 821     | Hubei (China)    | 33.69                                                            | 28.18  |
| B411          | Qinyou 1         | Hubei (China)    | 145.24                                                           | 136.64 |
| B412          | Weilong 88       | Hubei (China)    | 46.41                                                            | 30.01  |
| B413          | Yanyou 2         | Hubei (China)    | 38.82                                                            | 38.67  |
| B414          | Qinyou 5         | Hubei (China)    | 37.16                                                            | 37.26  |
| B415          | Suyong 4         | Jiangsu (China)  | 38.00                                                            | 37.71  |
| B416          | Fengyou 9        | Hubei (China)    | 40.05                                                            | 30.27  |
| B417          | De 68-12         | Hubei (China)    | 38.41                                                            | 34.75  |
| B418          | Monty            | Hubei (China)    | 38.77                                                            | 57.66  |
| B419          | Oscar            | Hubei (China)    | 35.64                                                            | 48.99  |
| B420          | Ningyou 12       | Hubei (China)    | 52.68                                                            | 61.08  |
| B421          | Ningyou 14       | Hubei (China)    | 47.47                                                            | 32.15  |
| B422          | Shilifeng        | Hubei (China)    | 72.56                                                            | 31.50  |
| B423          | Ningyou 18       | Hubei (China)    | 49.44                                                            | 31.48  |
| B424          | Ningyou 10       | Hubei (China)    | 50.22                                                            | 21.52  |
| B425          | Helios           | Hubei (China)    | 59.44                                                            | 59.64  |
| B426          | Hector           | Hubei (China)    | 123.45                                                           | 115.18 |
| B427          | Mian 96—203 (09) | Qinghai (China)  | 41.72                                                            | 77.08  |
| B428          | Qing 662A        | Hubei (China)    | 104.45                                                           | 71.31  |
| B429          | 699              | Hubei (China)    | 36.82                                                            | 40.16  |
| B430          | Canada 2         | Hubei (China)    | 106.27                                                           | 127.94 |
| B431          | Zhongshuang 2    | Hubei (China)    | 32.26                                                            | 27.46  |
| B432          | Zhongshuang 9    | Hubei (China)    | 37.35                                                            | 27.77  |
| B433          | WH-12            | Hubei (China)    | 40.58                                                            | 30.28  |
| B434          | WH-15            | Hubei (China)    | 43.77                                                            | 31.35  |
| B435          | WH-17            | Hubei (China)    | 36.64                                                            | 30.99  |
| B436          | WH-19            | Hubei (China)    | 35.94                                                            | 27.95  |
| B437          | WH-20            | Hubei (China)    | 37.91                                                            | 29.89  |
| B438          | WH-23            | Hubei (China)    | 30.75                                                            | 34.06  |
| B439          | WH-24            | Hubei (China)    | 35.36                                                            | 29.13  |
| B440          | WH-25            | Hubei (China)    | 36.11                                                            | 30.02  |

Table S1. Cont.

| Accession No. | Inbred Lines     | Country/Region | Seed Glucosinolate Content ( $\mu\text{mol}\cdot\text{g}^{-1}$ ) |        |
|---------------|------------------|----------------|------------------------------------------------------------------|--------|
|               |                  |                | 2013                                                             | 2014   |
| B441          | WH-26            | Hubei (China)  | 34.94                                                            | 48.68  |
| B442          | WH-27            | Hubei (China)  | 33.59                                                            | 28.47  |
| B443          | WH-28            | Hubei (China)  | 30.47                                                            | 28.22  |
| B444          | WH-29            | Hubei (China)  | 38.60                                                            | 41.91  |
| B445          | WH-30            | Hubei (China)  | 37.27                                                            | 32.35  |
| B446          | WH-31            | Hubei (China)  | 35.05                                                            | 28.42  |
| B447          | WH-33            | Hubei (China)  | 35.20                                                            | 30.36  |
| B448          | WH-37            | Hubei (China)  | 56.05                                                            | 40.94  |
| B449          | WH-38            | Hubei (China)  | 46.36                                                            | 33.04  |
| B450          | WH-41            | Hubei (China)  | 43.71                                                            | 30.93  |
| B451          | WH-42            | Hubei (China)  | 52.34                                                            | 42.51  |
| B452          | WH-43            | Hubei (China)  | 42.76                                                            | 37.22  |
| B453          | WH-45            | Hubei (China)  | 42.15                                                            | 36.74  |
| B454          | WH-49            | Hubei (China)  | 37.29                                                            | 28.98  |
| B455          | WH-50            | Hubei (China)  | 39.35                                                            | 67.87  |
| B456          | WH-55            | Hubei (China)  | 45.96                                                            | 38.53  |
| B457          | WH-56            | Hubei (China)  | 34.75                                                            | 40.50  |
| B458          | WH-57            | Hubei (China)  | 36.84                                                            | 32.67  |
| B459          | WH-58            | Hubei (China)  | 32.05                                                            | 29.27  |
| B460          | WH-59            | Hubei (China)  | 41.57                                                            | 39.27  |
| B461          | WH-60            | Hubei (China)  | 35.53                                                            | 47.37  |
| B462          | WH-61            | Hubei (China)  | 35.47                                                            | 25.38  |
| B463          | WH-62            | Hubei (China)  | 38.73                                                            | 30.12  |
| B464          | WH-63            | Hubei (China)  | 35.65                                                            | 28.63  |
| B465          | WH-81            | Hubei (China)  | 45.49                                                            | 26.66  |
| B466          | WH-83            | Hubei (China)  | 31.97                                                            | 26.66  |
| B467          | WH-85            | Hubei (China)  | 48.25                                                            | 35.49  |
| B468          | WH-88            | Hubei (China)  | 34.28                                                            | 22.74  |
| B469          | WH-93            | Hubei (China)  | 39.28                                                            | 38.54  |
| B470          | WH-95            | Hubei (China)  | 33.26                                                            | 31.95  |
| B471          | WH-100           | Hubei (China)  | 31.98                                                            | 28.12  |
| B472          | WH-127           | Hubei (China)  | 40.43                                                            | 35.53  |
| B473          | Yuyou1           | Henan (China)  | 29.25                                                            | 24.37  |
| B474          | COBRA            | Hubei (China)  | 81.56                                                            | 48.12  |
| B475          | NY7              | Hubei (China)  | 91.33                                                            | 91.79  |
| B476          | Tapidor          | Hubei (China)  | 65.33                                                            | 123.07 |
| B477          | Huayou 6         | Hubei (China)  | 115.53                                                           | 93.18  |
| B478          | Huayou 12        | Hubei (China)  | 37.80                                                            | 29.69  |
| B479          | Cubs root        | Hubei (China)  | 102.31                                                           | 90.11  |
| B480          | Huayou 10        | Hubei (China)  | 101.37                                                           | 96.50  |
| B481          | Bienvenu         | Hubei (China)  | 117.54                                                           | 126.41 |
| B482          | Shengli rapeseed | Hubei (China)  | 99.43                                                            | 97.99  |
| B483          | ERAKE            | Hubei (China)  | 39.23                                                            | 35.51  |

Table S1. Cont.

| Accession No. | Inbred Lines                | Country/Region   | Seed Glucosinolate Content ( $\mu\text{mol}\cdot\text{g}^{-1}$ ) |        |
|---------------|-----------------------------|------------------|------------------------------------------------------------------|--------|
|               |                             |                  | 2013                                                             | 2014   |
| B484          | Taisetsu                    | Hubei (China)    | 109.34                                                           | 109.99 |
| B485          | cresor                      | Hubei (China)    | 93.61                                                            | 96.09  |
| B486          | Daichousen                  | Hubei (China)    | 85.18                                                            | 73.96  |
| B487          | comet                       | Hubei (China)    | 40.58                                                            | 51.78  |
| B488          | Niklas                      | Hubei (China)    | 124.59                                                           | 121.72 |
| B489          | Askari                      | Hubei (China)    | 121.35                                                           | 140.95 |
| B490          | chuosenshu                  | Hubei (China)    | 93.42                                                            | 110.22 |
| B491          | WESBROOK                    | Hubei (China)    | 50.00                                                            | 41.60  |
| B492          | Suigenshu                   | Hubei (China)    | 114.96                                                           | 104.62 |
| B493          | Huayou 4                    | Hubei (China)    | 125.30                                                           | 132.35 |
| B494          | Shengliqinggeng             | Shanghai (China) | 91.80                                                            | 74.23  |
| B495          | Mijiaoduotou rapeseed       | Shanghai (China) | 105.53                                                           | 115.36 |
| B496          | Aijishengli                 | Shanghai (China) | 101.17                                                           | 97.69  |
| B497          | Caojingshengli              | Shanghai (China) | 115.39                                                           | 126.19 |
| B498          | Huyou 3                     | Shanghai (China) | 106.66                                                           | 121.73 |
| B499          | Shaoyeqing                  | Shanghai (China) | 91.75                                                            | 89.83  |
| B500          | African rapeseed ruhuanghua | Shanghai (China) | 135.65                                                           | 162.51 |
| B501          | Hujizao                     | Shanghai (China) | 77.31                                                            | 77.18  |
| B502          | Caoyou 2                    | Shanghai (China) | 119.34                                                           | 132.07 |
| B503          | Huyou 16                    | Shanghai (China) | 48.85                                                            | 41.08  |
| B504          | Fengding 240                | Jiangsu (China)  | 95.29                                                            | 102.30 |
| B505          | Quanzi rapeseed             | Jiangsu (China)  | 35.02                                                            | 45.02  |
| B506          | Dahuaqiu                    | Jiangsu (China)  | 105.21                                                           | 109.36 |
| B507          | Rongxuan                    | Jiangsu (China)  | 72.09                                                            | 70.76  |
| B508          | Ningyou 10                  | Jiangsu (China)  | 120.41                                                           | 141.82 |
| B509          | Ningyou 8                   | Jiangsu (China)  | 103.32                                                           | 75.93  |
| B510          | Ningyou 6                   | Jiangsu (China)  | 99.12                                                            | 102.92 |
| B511          | Duoyou 1                    | Jiangsu (China)  | 103.97                                                           | 96.19  |
| B512          | Huaiyou 6                   | Jiangsu (China)  | 105.52                                                           | 113.64 |
| B513          | Huaiyou 12                  | Jiangsu (China)  | 113.28                                                           | 119.54 |
| B514          | Peixuan 170                 | Jiangsu (China)  | 99.81                                                            | 84.64  |
| B515          | Guangde 138                 | Anhui (China)    | 110.45                                                           | 109.62 |
| B516          | Guangde 8104                | Anhui (China)    | 125.04                                                           | 137.73 |
| B517          | Dangyouzao 1                | Anhui (China)    | 96.69                                                            | 67.27  |
| B518          | Guangde 761                 | Anhui (China)    | 108.31                                                           | 106.39 |
| B519          | Tonglinghuaye               | Anhui (China)    | 128.19                                                           | 133.44 |
| B520          | Chu 610                     | Anhui (China)    | 111.54                                                           | 111.68 |
| B521          | Chu 107                     | Anhui (China)    | 117.22                                                           | 141.73 |
| B522          | Su 84-6                     | Anhui (China)    | 117.66                                                           | 109.86 |
| B523          | Huanyouzao                  | Anhui (China)    | 103.22                                                           | 103.75 |
| B524          | Chuyou1                     | Anhui (China)    | 106.52                                                           | 101.26 |
| B525          | Chuxianbaihua               | Anhui (China)    | 99.29                                                            | 117.09 |
| B526          | Jie 65-1                    | Zhejiang (China) | 114.59                                                           | 105.62 |

Table S1. Cont.

| Accession No. | Inbred Lines    | Country/Region   | Seed Glucosinolate Content ( $\mu\text{mol}\cdot\text{g}^{-1}$ ) |        |
|---------------|-----------------|------------------|------------------------------------------------------------------|--------|
|               |                 |                  | 2013                                                             | 2014   |
| B527          | Shenhuang1      | Shanghai (China) | 68.99                                                            | 66.45  |
| B528          | Zheyong 601     | Zhejiang (China) | 36.77                                                            | 31.44  |
| B529          | Sangao rapeseed | Zhejiang (China) | 38.95                                                            | 25.95  |
| B530          | Zaofeng 1       | Zhejiang (China) | 129.91                                                           | 142.25 |

Table S2. Primer information used for qRT-PCR analysis between the high and low seed glucosinolate content *B. napus*.

| Primers          | Forward Sequence (5'-3')  | Reverse Sequence (5'-3')  | Length (bp) | T <sub>m</sub> (°C) |
|------------------|---------------------------|---------------------------|-------------|---------------------|
| <i>BnGTR2-1</i>  | AAGACTCTTACCGTTGCGGTCCTC  | TCCCTCCTGCTCCCACGACA      | 184         | 64                  |
| <i>BnGTR2-2</i>  | GGGTAAAGCCAACAAAAGAGCCT   | TCAAGAAGACAACGTAAGTGGCTGC | 364         | 60                  |
| <i>BnGTR2-3</i>  | ACACCCAACAATTCAGGTTTCTCG  | ACGTTCCAAGACACGGTCATAAAAT | 335         | 64                  |
| <i>BnMYB34-1</i> | TCCGGTTCAGCACGGGTCT       | CTTCGTTGCTAAAGAAGTCCGGTGA | 256         | 60                  |
| <i>BnMYB34-2</i> | CGTCGCCGACGTTTCACAAAAGTCC | ATCAGACAAAGAAGTTCGGGAG    | 155         | 62                  |
| <i>BnMYB28</i>   | GGACCACCGAGGAAGATAAGAAACT | CGTTTCTTGAGATGTGTGTCCAGT  | 295         | 62                  |

© 2015 by the authors; licensee MDPI, Basel, Switzerland. This article is an open access article distributed under the terms and conditions of the Creative Commons Attribution license (<http://creativecommons.org/licenses/by/4.0/>).
